# Supplementary material
Source: HighWire-hosted journal article supplement (http://ajnr-stage2.highwire.org/highwire/filestream/100409/field_highwire_adjunct_files/0/0667.pdf)
Supplement: 0667.pdf [file 0667.pdf]

**Online Supplemental Table: Demographic and clinical information of skull base osteomyelitis**

| <i>Demographic</i>                 |                      |
|------------------------------------|----------------------|
| Sex                                | Male = 4, Female = 4 |
| Median age (years [range])         | 69.5 (60–76)         |
| <i>Clinical</i>                    |                      |
| Presence of ear or sinus lesions   |                      |
| Ear lesions                        | 4/8 (50.0%)          |
| Sinus lesions                      | 2/8 (25.0%)          |
| None                               | 2/8 (25.0%)          |
| Diabetes mellitus                  |                      |
| Yes                                | 8/8 (100.0%)         |
| Presence of cranial nerve symptoms |                      |
| Yes                                | 6/8 (75.0%)          |
| No                                 | 2/8 (25.0%)          |
| Cranial nerve symptoms             |                      |
| XII                                | 3/12 (25.0%)         |
| X                                  | 2/12 (16.7%)         |
| VII                                | 2/12 (16.7%)         |
| IX                                 | 1/12 (8.3%)          |
| VIII                               | 1/12 (8.3%)          |
| VI                                 | 1/12 (8.3%)          |
| V                                  | 1/12 (8.3%)          |
| II                                 | 1/12 (8.3%)          |
| Pathology                          |                      |
| Inflammation                       | 4/8 (50.0%)          |
| Chronic inflammation               | 2/8 (25.0%)          |
| Granulation tissue                 | 1/8 (12.5%)          |
| None                               | 1/8 (12.5%)          |
| Cultured causative bacteria        |                      |
| Pseudomonas aeruginosa             | 3/8 (37.5%)          |
| Staphylococcus aureus              | 2/8 (25.0%)          |
| Negative                           | 3/8 (37.5%)          |
| Treatment                          |                      |
| Antibiotics                        | 7/8 (87.5.0%)        |
| Antibiotics + Debridement          | 1/8 (12.5%)          |
| Clinical course                    |                      |
| Improvement                        | 8/8 (100.0%)         |
